# Supplementary material for: How Does Time Spent Working in Custody Influence Health and Fitness Characteristics of Law Enforcement Officers?
Source: MDPI journal article supplement (doi:10.3390/ijerph18179297), 2021-09-03
Supplement: s1 [file s1]

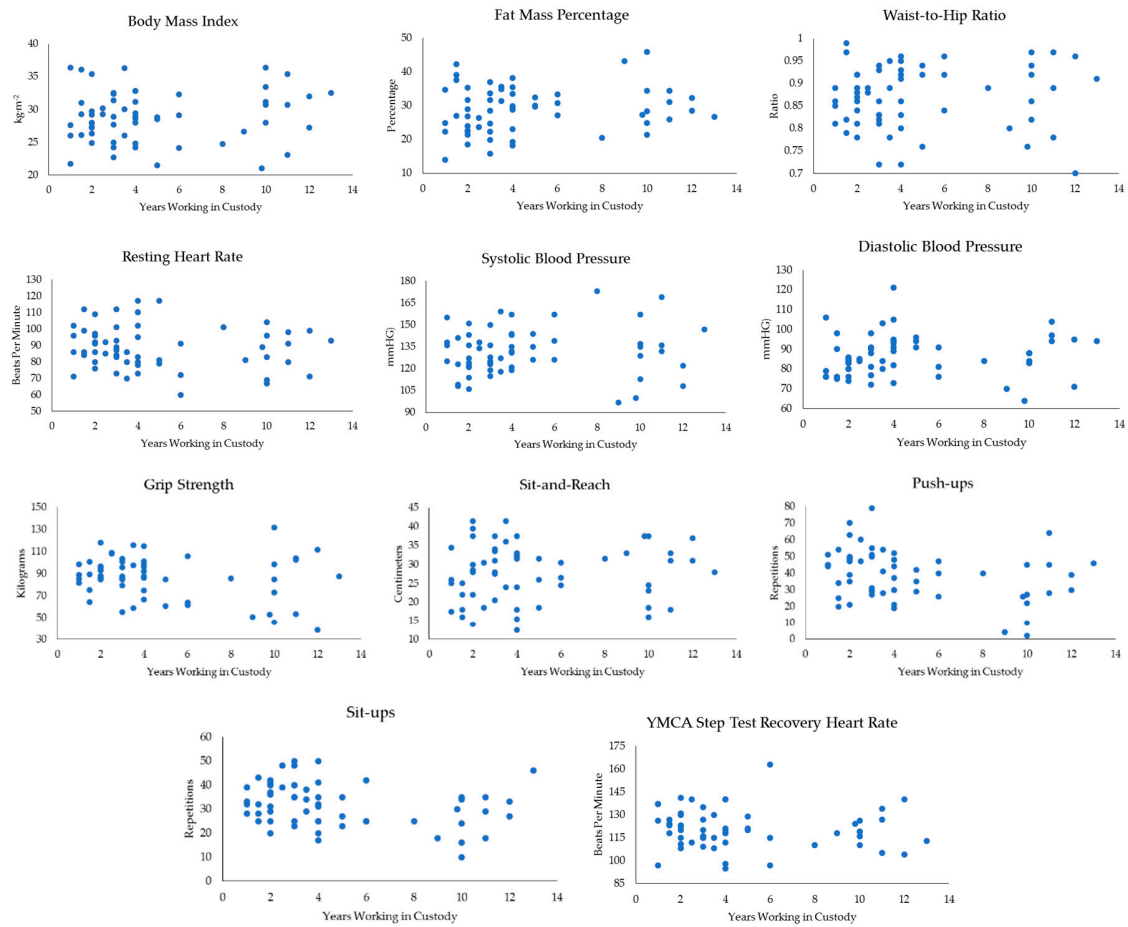

**Figure S1.** Scatter plot data for body mass index, fat mass percentage, waist-to-hip ratio, resting heart rate, systolic and diastolic blood pressure, combined grip strength, sit-and-reach, push-ups, sit-ups, and recovery heart rate from the YMCA step test in law enforcement officers relative to years spent working in custody.
